# Supplementary material for: An efficient and heterogeneous recyclable palladium catalyst for chemoselective conjugate reduction of α,β-unsaturated carbonyls in aqueous medium
Source: Royal Society of Chemistry journal article supplement (doi:10.1039/c1gc15050b), 2011-01-01

**Electronic Supplementary Information**

**Title: An efficient and heterogeneous recyclable palladium catalyst for chemoselective conjugate reduction of  $\alpha,\beta$ -unsaturated carbonyls in aqueous medium**

**Dattatraya B. Bagal, Ziyauddin S. Qureshi, Kishor P. Dhake, Shoeb R. Khan and Bhalchandra M. Bhanage\***

Department of Chemistry, Institute of Chemical Technology (Autonomous), Matunga, Mumbai 400 019, India.

\* Corresponding author. Tel.: + 91- 22 3361 1111/2222; Fax: +91- 22 2414 5614.

E-mail address: bhalchandra\_bhanage@yahoo.com, bm.bhanage@ictmumbai.edu.in. (B. M. Bhanage)

### A) Typical experimental procedure for chemoselective conjugates reduction of benzylideneacetophenone

In a 10 mL deionised water, 1 mmol of benzylideneacetophenone, 3 mmol of HCOONa and polymer supported Pd-NHC catalyst (50 mg, 0.015 mmol) were added in round bottom flask and the reaction mixture was stirred at 100 °C for 12 h. The progress of the reaction was monitored using GC analysis (Perkin Elmer, Clarus 400) (BP-10 GC column, 30 m × 0.32 mm ID, film thickness 0.25 mm). On completion, the reaction mixture was cooled to room temperature and the products were extracted with ethyl acetate, dried over Na<sub>2</sub>SO<sub>4</sub> and the solvent was evaporated under vacuum. The obtained crude product was then purified by column chromatography using silica gel, (100–200 mesh size,) with petroleum ether/ethyl acetate (PE–EtOAc, 95:05) as eluent to afford pure product.

### Temperature programme for GC-MS Analysis

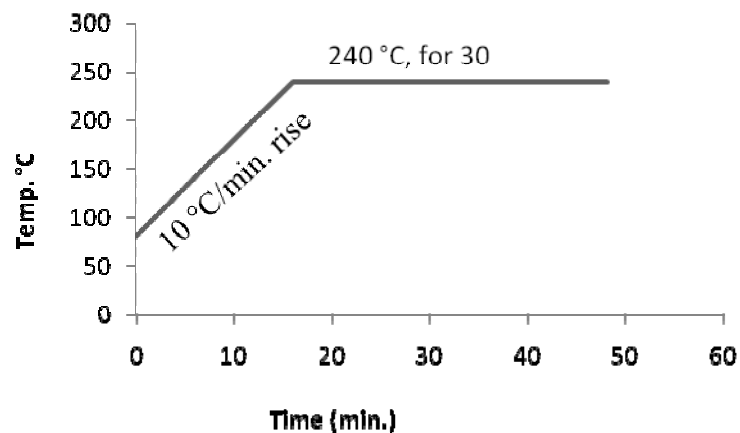

All products are known, which were confirmed by GC-MS analysis. Some of the selected compounds were characterized by different spectroscopic techniques such as  $^1\text{H}$  NMR (Varian Mercury, 400 MHz NMR Spectrometer),  $^{13}\text{C}$  NMR spectra (75.43 MHz), GC-MS (Shimadzu GC-MS QP 2010) (Rtx-17, 30 m  $\times$  25mmID, film thickness 0.25  $\mu\text{m}$  df) (column flow- 2 mL/min, 80  $^\circ\text{C}$  to 240  $^\circ\text{C}$  at 10 $^\circ$ /min. rise.) and IR (Perkin-Elmer FT-IR) spectroscopic techniques.

## **B) A typical procedure for the preparation of polymer supported palladium-*N*-heterocyclic carbene (PS-Pd-NHC) catalyst**

### **Step-1 Preparation of imidazolium-loaded polymeric support (MR-IMZ-Cl)**

In 100 mL round bottom flask were added Merrifield peptide resin (2 % cross linked, 2.3 mmol Cl/g, Aldrich) 5 g, *N*-methyl imidazole (20 mmol) in toluene (50 mL) and refluxed for 24 hour. On completion, the reaction mixture was cooled to room temperature. It was then filtered and the residue obtained was washed with toluene, 0.1 mol/L HCl, water and methanol sequentially followed by drying under reduced pressure to afford imidazolium-loaded polymeric support MR-IMZ-Cl (loading of ionic liquid : 1.67 mmol/g, determined by elemental analysis). The catalyst was further characterized by FTIR to check the attachment of the ionic liquid. A strong band centred at 1569  $\text{cm}^{-1}$  confirms the attachment of the imidazole on Merrifield resin.

## **Step-2 Preparation of polymer supported palladium-*N*- heterocyclic carbene complex with the imidazolium-loaded polymeric support (PS-Pd-NHC)**

A mixture of the imidazolium loaded polymeric support (MR-IMZ-Cl) (1.0 g, 19.1 mmol/g) and Pd(OAc)<sub>2</sub> (0.225 g, 1 mmol) was suspended in DMF (20 mL). To this suspension an aqueous solution (20 mL) of Na<sub>2</sub>CO<sub>3</sub> (1.06 g, 10.0 mmol) was added. The mixture was then sonicated at room temperature for 30 min and agitated in an orbital shaker at 50 °C for 2 h at 150 rpm. On completion, the reaction mixture was filtered and the polymeric support was washed vigorously with distilled water (10 mL × 5), MeOH (10 mL × 5), and dried under reduced pressure to give PS-Pd-NHC. Prepared PS-Pd-NHC was then characterized by solid state <sup>13</sup>C NMR (Bruker Avance<sup>III</sup> 700 MHz); δ 14 (CH<sub>3</sub> aliphatic acetate skeleton), 38 (N-CH<sub>3</sub> skeleton), 41 (aliphatic polystyrene skeleton), 128 (NCH, NCH, aromatic polystyrene skeleton), 147 (NCN, aromatic polystyrene skeleton), 187 (C=O acetate skeleton).

### Schematic representation of preparation of PS-Pd-NHC catalyst

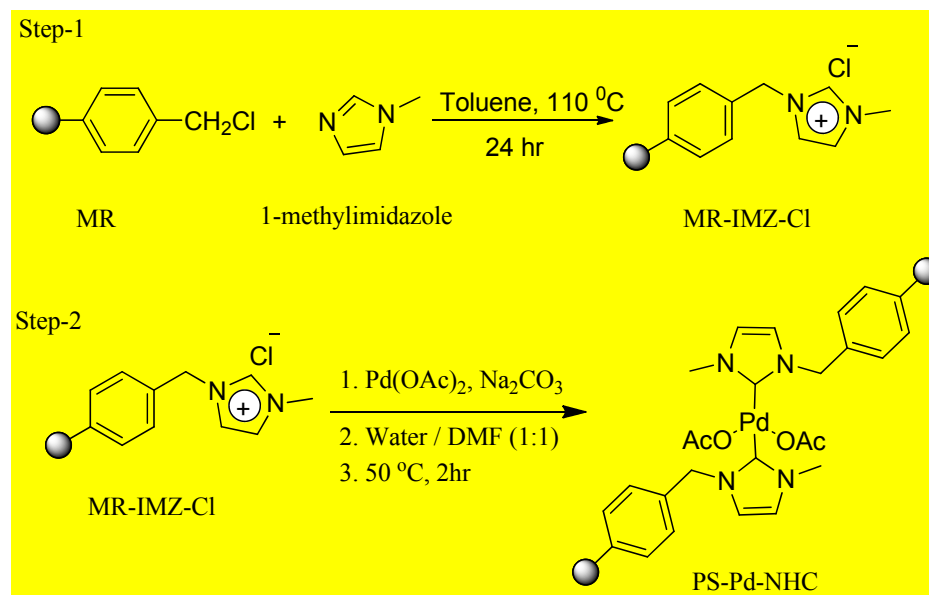

The amount of Pd loaded on the polymeric support was determined by using ICP-AES analysis. The polymer supported palladium-*N*- heterocyclic carbene complex (50 mg) was treated with a mixture (25 mL) of hydrochloric acid and nitric acid (1:1, v/v) at room temperature for 30 minutes. The orange-coloured solution formed was filtered, washed with distilled water. The filtrate and washing solution were combined to determine the amount of Pd by Inductively Coupled Plasma-Atomic Emission Spectrometry (ICP-AES) and was found to be about 0.29 mmol/g of support.

### Solid state $^{13}\text{C}$ NMR spectra of PS-Pd-NHC complex

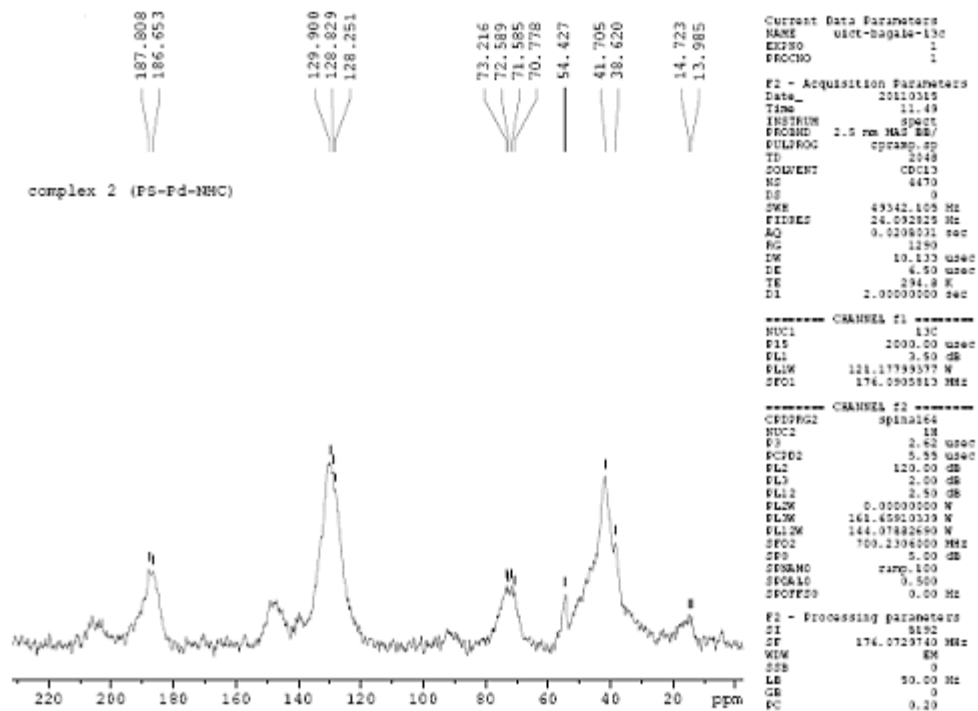



### C) Characterisation data of some selected compounds:

#### 1) 1, 3-Diphenyl-propan-1-one (Table 3 entry 1) White solid

$^1\text{H}$  NMR (400 MHz, DMSO- $d_6$ )  $\delta$ =7.99(d, 2H, J=7.6 Hz), 7.6 (t, 1H, J=7.6 Hz), 7.5(m, 2H, J=8), 7.28 (d, 4H, J=7.6 Hz), 7.17 (d, 1H, J=7.2 Hz), 3.37 (t, 2H, J= 8), 2.94 (t, 2H, J= 7.6 Hz);  $^{13}\text{C}$  (75 MHz, DMSO- $d_6$ ) 199.1, 141.2, 136.5, 133.1, 128.6, 128.3, 127.9, 125.8, 39.5, 29.4; IR (KBr)  $\nu_{\text{max}}/\text{cm}^{-1}$  3061, 2927, 2341, 1957, 1824, 1681, 1595, 1494, 1448, 1208, 1075, 973, 928, 743, 701; GC-MS (EI)  $m/z$  (%) = 210(38)  $[\text{M}]^+$ , 106(9), 105(100), 91(12), 77(42), 51(11) Retention time- 14.8 minute.

#### 2) 3-(4-Methoxy-phenyl)-1-phenyl-propan-1-one (Table 3 entry 2) White Solid

$^1\text{H}$  NMR (400 MHz, DMSO- $d_6$ )  $\delta$ =7.97(d, 2H, J=7.2 Hz), 7.62 (t, 1 H, J=7.6 Hz), 7.51(t, 2H, J=8 Hz), 7.18(d, 2H, J=8.4 Hz), 6.83 (d, 2H, J=8.4 Hz), 3.7 (s, 3H), 3.32 (t, 2H, J=7.6), 2.8 (t, 2H, J=7.2);  $^{13}\text{C}$  (75 MHz, DMSO- $d_6$ ) 199.2, 157.5, 136.6, 133, 129.4, 129.3, 128.6, 127.9, 113, 54.9, 39.2, 28.6; IR (KBr)  $\nu_{\text{max}}/\text{cm}^{-1}$  3000, 2958, 2823, 2356, 1896, 1681, 1608, 1510, 1447, 1237, 1033, 825, 744; GC-MS (EI)  $m/z$  (%) =240(40)  $[\text{M}]^+$ , , 135(12), 122(9), 121(100), 108(18), 105(47), 77(41), 78(8), 51(8) Retention time- 18.1 min.

#### 3) 4-Phenyl-butan-2-one (Table 3 entry 5) Colourless Oil.

$^1\text{H}$  NMR (400 MHz, DMSO- $d_6$ )  $\delta$ =7.26 (t, 2H, J=7.6 Hz), 7.19 (d, 2H, J=8.4 Hz), 7.16(d, 1H, J=7.6 Hz), 2.76 (s, 4H), 2.1 (s, 3H);  $^{13}\text{C}$  (75 MHz, DMSO- $d_6$ ) 207.5, 141.1, 128.9, 128.2, 125.7, 44.1, 29.6, 29.05; IR (neat)  $\nu_{\text{max}}/\text{cm}^{-1}$  3027, 2928,



1716, 1603, 1496, 1453, 1358, 1161, 1030, 749, 699; GC-MS (EI)  $m/z$  (%) = 148(83)  $[M]^+$ , 147(4.5), 133(17), 106(10), 105(100), 104(14), 103(15), 91(74), 79(19), 78(16), 77(25), 65(14), 43(93) Retention time- 7.1 min.

**4) Cyclohexanone (Table 3 entry 6) Colourless liquid**

$^1\text{H}$  NMR (400 MHz, DMSO- $d_6$ )  $\delta$ =2.25 (t, 4H,  $J$ =6.4 Hz), 1.76 (t, 4H,  $J$ =6 Hz), 1.65 (d, 2H,  $J$ =4.4 Hz);  $^{13}\text{C}$  (75 MHz, DMSO- $d_6$ ) 210, 41.31, 26.5, 24.3; IR (neat)  $\nu_{\text{max}}/\text{cm}^{-1}$  2938, 2863, 1711, 1449, 1421, 1338, 1311, 1222, 1119, 1052, 1018, 908, 864, 750; GC-MS (EI)  $m/z$  (%) = 98(39)  $[M]^+$ , 83(10), 70(24), 69(32), 55(100), 54(8), 43(12), 42(7), 41(34) Retention time- 2.8 min.

**5) 3-(4-Chloro-phenyl)-1-phenyl-propan-1-one (Table 3 entry 8) off White solid.**

$^1\text{H}$  NMR (400 MHz, DMSO- $d_6$ )  $\delta$ =7.97(d, 2H,  $J$ =8 Hz), 7.62 (t, 1 H,  $J$ =7.2 Hz), 7.51(t, 2H,  $J$ =7.6 Hz), 7.33(d, 2H,  $J$ =8.8 Hz), 7.27 (d, 2H,  $J$ =8.8 Hz), 3.37 (t, 2H,  $J$ =7.6), 2.9 (t, 2H,  $J$ =7.6);  $^{13}\text{C}$  (75 MHz, DMSO- $d_6$ ) 198.9, 140.3, 136.5, 133.1, 130.4, 130.3, 128.6, 127.9, 39.9, 28.7; IR (KBr)  $\nu_{\text{max}}/\text{cm}^{-1}$  2929, 1967, 1903, 1682, 1492, 1448, 1261, 1094, 823, 689; GC-MS (EI)  $m/z$  (%) =244(22)  $[M]^+$ , 106(8), 105(100), 77(43), 51(10) Retention time- 17.1 min.

**6) 1-Phenyl-3-thiophen-2-yl-propan-1-one (Table 3 entry 10) White Solid.**

$^1\text{H}$  NMR (400 MHz, DMSO- $d_6$ )  $\delta$ =8.04(d, 2H,  $J$ =7.6 Hz), 7.69 (t, 1 H,  $J$ =7.2 Hz), 7.57(t, 2H,  $J$ =7.6 Hz), 7.34(d, 1H,  $J$ =4.4 Hz), 6.97 (d, 2H,  $J$ =4.4 Hz), 3.47 (s, 2H,  $J$ = 7.2), 3.2 (t, 2H,  $J$ =7.2);  $^{13}\text{C}$  (75 MHz, DMSO- $d_6$ ) 198.5, 143.6, 136.4, 133.1, 128.6, 127.8, 126.7, 124.7, 123.6, 39.6, 23.5; IR (KBr)  $\nu_{\text{max}}/\text{cm}^{-1}$  3104, 2923, 1980, 1683, 1595, 1446, 1363, 1207, 972,

747, 705; GC-MS (EI) m/z (%) =216(51) [M]<sup>+</sup>, 111(56), 110(14), 105(100), 97(64), 84(10), 77(75), 51(21), 45(13)

Retention time- 15.1 min.

**7) 3-Furan-2-yl-1-phenyl-propan-1-one (Table 3 entry 11) Yellow Oil.**

<sup>1</sup>H NMR (400 MHz, DMSO-d<sup>6</sup>) δ=8.0(d, 2H, J=8 Hz), 7.64 (t, 1 H, J=7.6 Hz), 7.53(d, 2H, J=7.6 Hz), 7.5(d, 1H, J=7.6 Hz), 6.34 (bs, 1H, J=8 Hz), 6.13 (bs, 1H, J=2.8 Hz), 3.38 (t, 2H, J= 7.2), 2.96 (t, 2H, J=7.2); <sup>13</sup>C (75 MHz, DMSO-d<sup>6</sup>) 198.5, 154.6, 141.2, 136.44, 133.19, 128.7, 127.9, 105, 36.1, 21.9; IR (neat) ν<sub>max</sub>/cm<sup>-1</sup> 3061, 2920, 1685, 1597, 1507, 1448, 1363, 1206, 1076, 1012, 975, 921, 803, 733, 689; GC-MS (EI) m/z (%) =200(45) [M]<sup>+</sup>, 144(6), 106(9), 105(100), 95(35), 94(11), 91(14), 77(65), 53(12), 51(20) Retention time- 12.6 min.

Table 3 entry 1,  $^1\text{H}$

1,3-Diphenyl-propan-1-one

29-Crude

$^1\text{H}$ , DMSO- $d_6$

Ref No : 04-031110-15

MR 400 MHz

Analyst : NITIN

Sample Name:

29-Crude

Data Collected on:

Varian-NMR-vnmrs400

Archive directory:

Sample directory:

FidFile: PROTON

Pulse Sequence: PROTON (s2pul)

Solvent: dmsO

Data collected on: Nov 3 2010

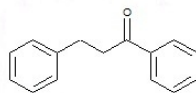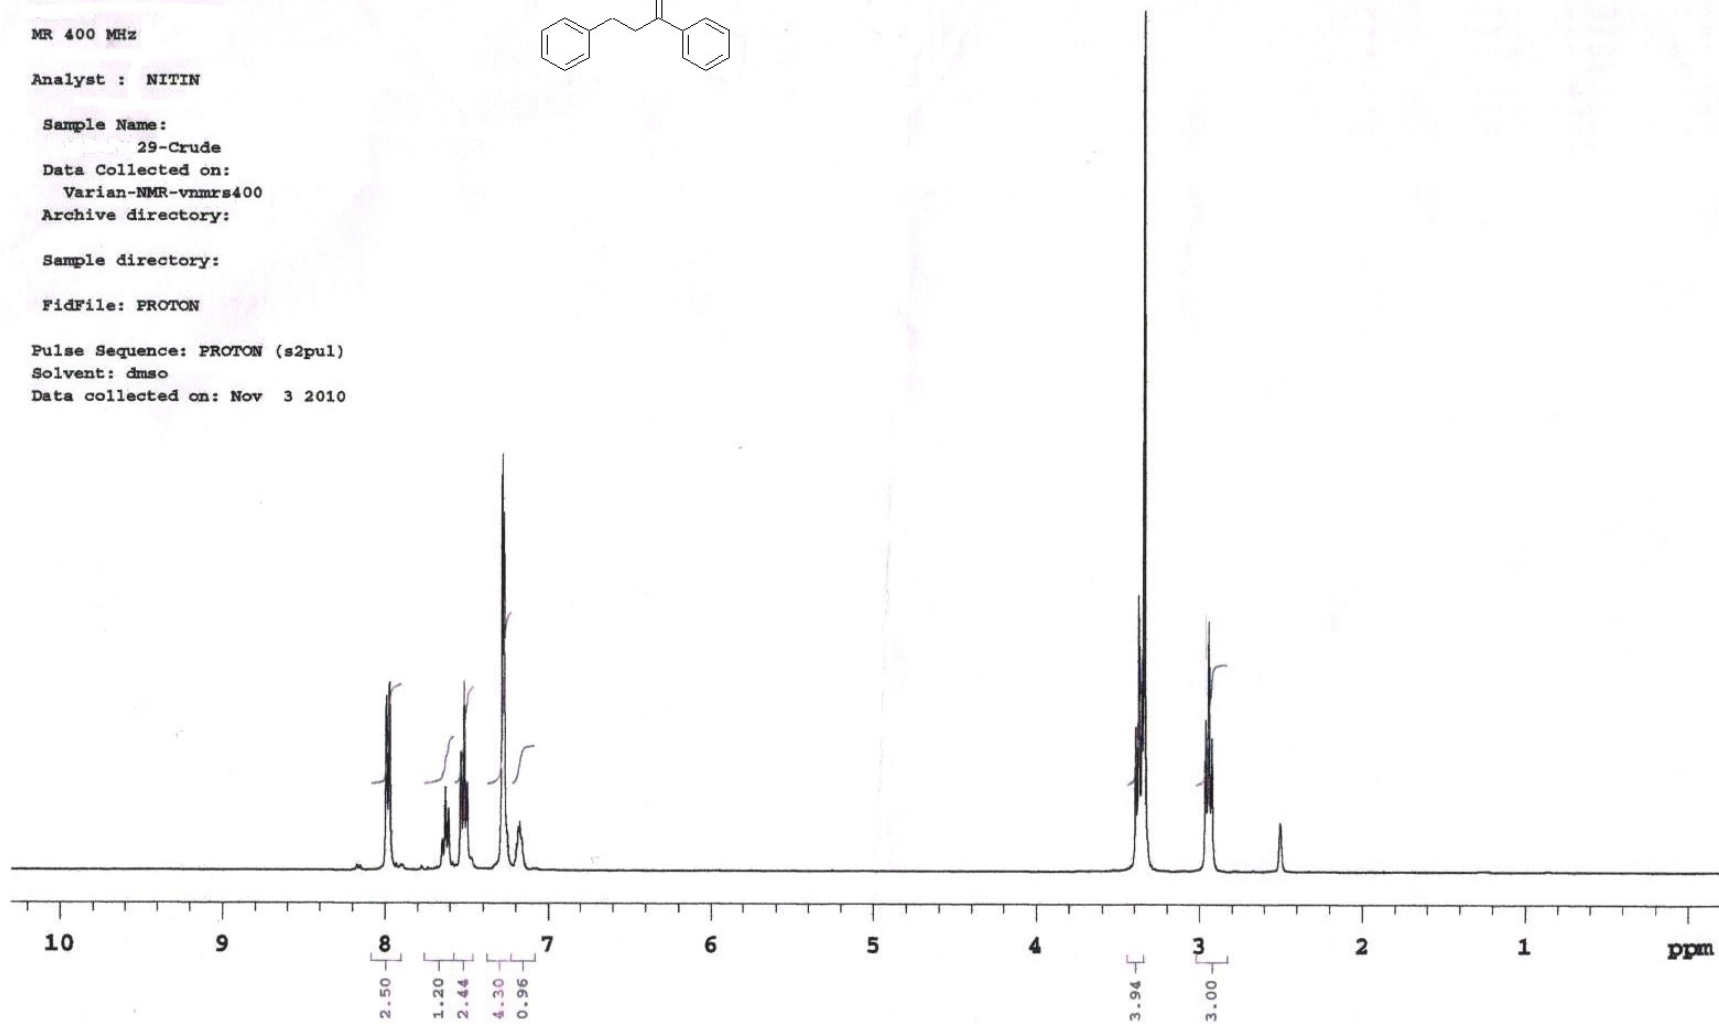

Table 3 entry 1, <sup>13</sup>C

1,3-diphenylpropan-1-one

R.NO-029

exp1 s2pu1

| SAMPLE              |                | SPECIAL |          |
|---------------------|----------------|---------|----------|
| date                | Mar 4 2011     | temp    | not used |
| solvent             | DMSO           | gain    | 2        |
| file                | /export/home/~ | spin    | not used |
| vnmr1/2011/March/E~ | hst            | 0.008   |          |
| XTERNAL/Dinsh-UICT~ | pw90           | 11.500  |          |
| /R.No-029.fid       | alfa           | 20.000  |          |

  

| ACQUISITION |         | FLAGS |          |
|-------------|---------|-------|----------|
| sw          | 23980.8 | i1    | n        |
| at          | 1.815   | in    | n        |
| np          | 87052   | dp    | y        |
| fb          | 13200   | hs    | nn       |
| bs          | 4       |       |          |
| d1          | 3.000   | lb    | 4.00     |
| nt          | 12000   | fn    | not used |
| ct          | 120     |       |          |

  

| TRANSMITTER |        | DISPLAY |         |
|-------------|--------|---------|---------|
| tn          | C13    | sp      | -500.7  |
| sfrq        | 75.430 | wp      | 17961.5 |
| tof         | 748.9  | rfl     | 6725.6  |
| tpwr        | 56     | rfp     | 2979.2  |
| pw          | 4.750  | rp      | -135.9  |
|             |        | lp      | -310.7  |

  

| DECOUPLER |       | PLOT |     |
|-----------|-------|------|-----|
| dn        | H1    | wc   | 250 |
| dof       | 0     | sc   | 0   |
| dm        | YYY   | vs   | 68  |
| dmm       | w     | th   | 4   |
| dpwr      | 39    | nm   | ph  |
| dmf       | 11300 |      |     |

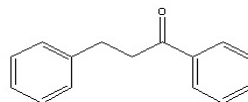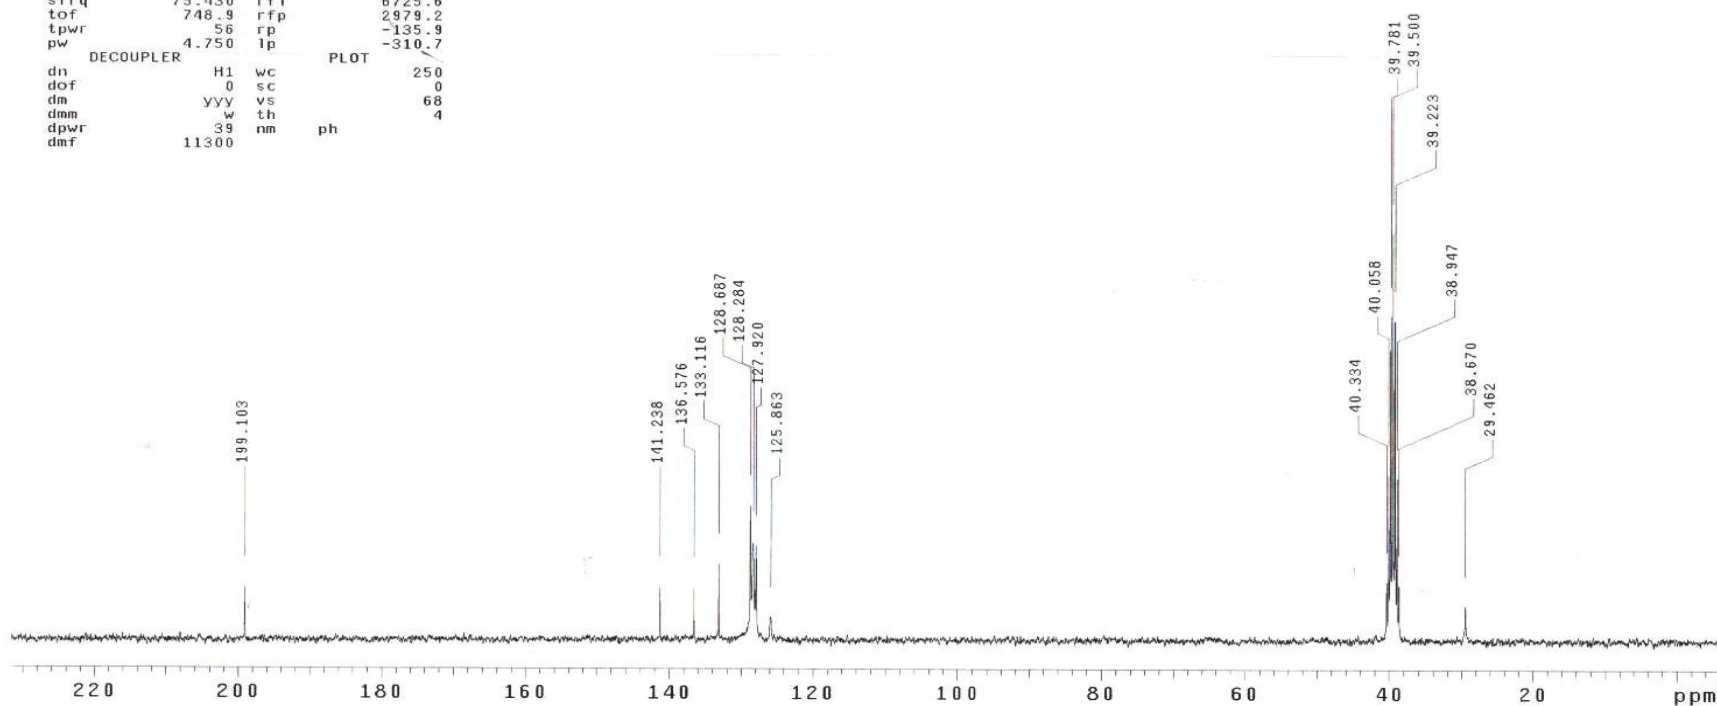

Table 3 entry 2,  $^1\text{H}$

3-(4-Methoxy-phenyl)-1-phenyl-propan-1-one

$^1\text{H}$ , DMSO- $d_6$   
Ref No : 04-031110-22

MR 400 MHz

Analyst : NITIN

Sample Name:  
41-Crude  
Data Collected on:  
Varian-NMR-vnmrs400  
Archive directory:

Sample directory:

FidFile: PROTON

Pulse Sequence: PROTON (s2pul)  
Solvent: dms0  
Data collected on: Nov 3 2010

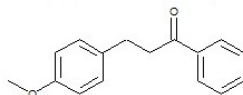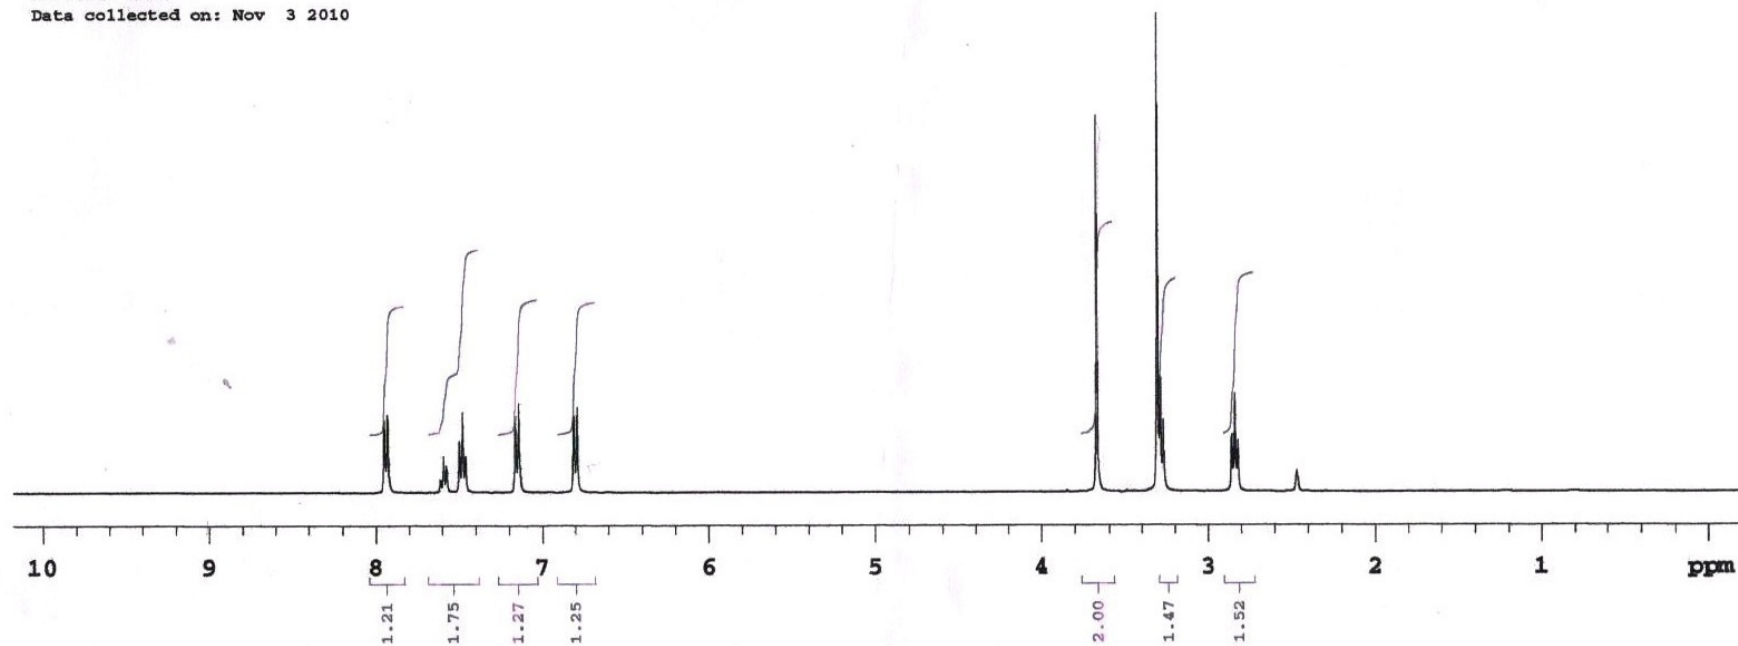

Table 3 entry 2, <sup>13</sup>C

3-(4-methoxyphenyl)-1-phenylpropan-1-one

R.No.041

exp1 s2pu1

| SAMPLE              |                | SPECIAL |          |
|---------------------|----------------|---------|----------|
| date                | Mar 4 2011     | temp    | not used |
| solvent             | DMSO           | gain    | 2        |
| file                | /export/home/~ | spin    | not used |
| vnmr1/2011/March/E~ |                | hst     | 0.008    |
| XTERNAL/Dinsh-UICT~ |                | pw90    | 11.500   |
| /R.NO.041.fid       |                | alfa    | 20.000   |

  

| ACQUISITION |         | FLAGS |          |
|-------------|---------|-------|----------|
| sw          | 23980.8 | il    | n        |
| at          | 1.815   | in    | n        |
| np          | 87052   | dp    | y        |
| fb          | 13200   | hs    | nn       |
| bs          | 4       |       |          |
| d1          | 3.000   | lb    | 2.00     |
| nt          | 12000   | fn    | not used |
| ct          | 256     |       |          |

  

| TRANSMITTER |        | DISPLAY |         |
|-------------|--------|---------|---------|
| tn          | C13    | sp      | -27.9   |
| sfrq        | 75.430 | wp      | 16606.5 |
| tof         | 748.9  | rfl     | 6725.2  |
| tpwr        | 56     | rfd     | 2979.2  |
| pw          | 4.750  | rp      | -120.7  |
|             |        | lp      | -347.9  |

  

| DECOUPLER |       | PLOT |     |
|-----------|-------|------|-----|
| dn        | H1    | wc   | 250 |
| dof       | 0     | sc   | 0   |
| dm        | YYY   | vs   | 110 |
| dmm       | w     | th   | 4   |
| dpwr      | 39    | nm   | ph  |
| dmf       | 11300 |      |     |

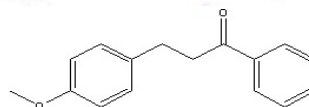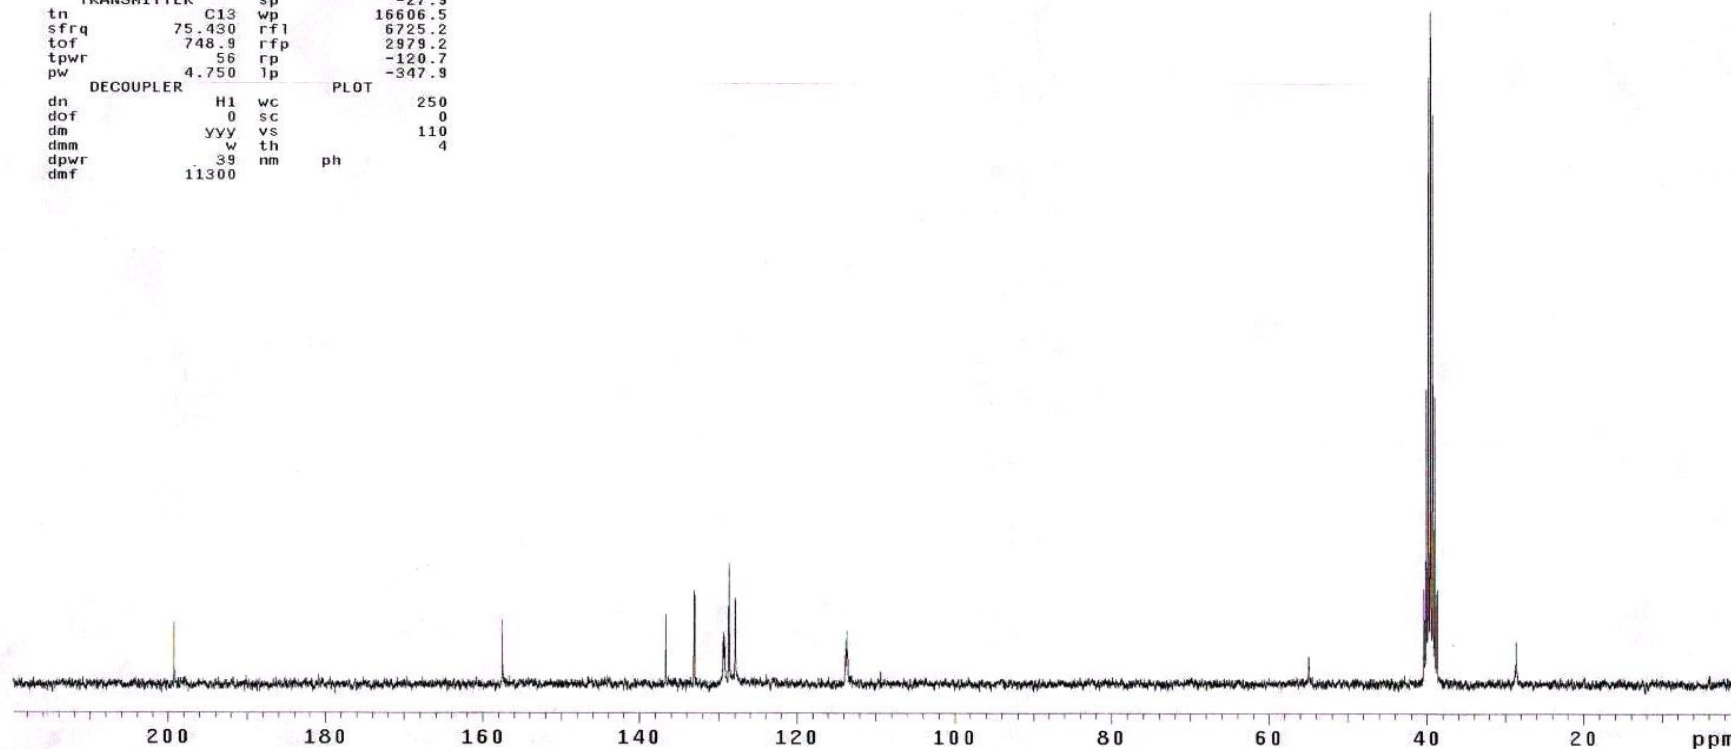

Table 3 entry 5,  $^1\text{H}$

4-Phenyl-butan-2-one  
048-Crude  
 $^1\text{H}$ , DMSO- $d_6$   
Ref No : 04-11110-33

MR 400 MHz

Analyst : RAVINDRA

Sample Name:  
048-Crude  
Data Collected on:  
Varian-NMR-vnmrs400  
Archive directory:

Sample directory:

FidFile: PROTON

Pulse Sequence: PROTON (s2pul)  
Solvent: dmsc  
Data collected on: Nov 11 2010

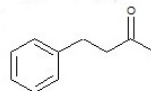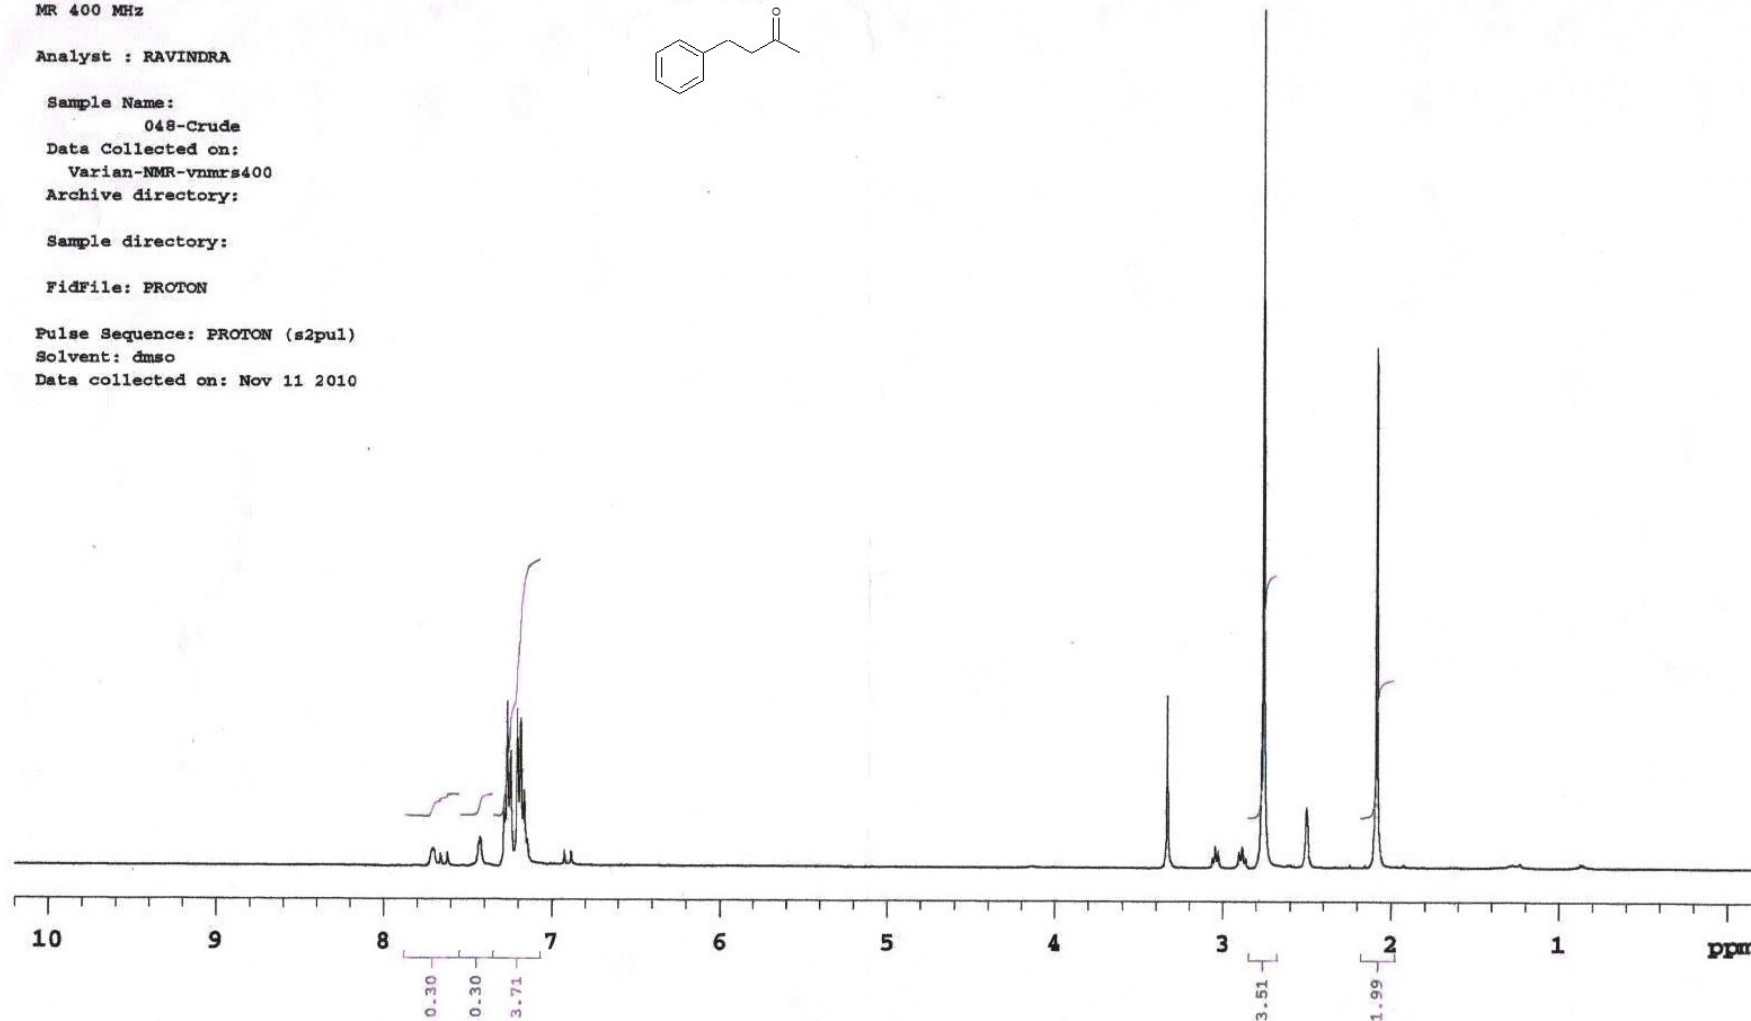

Table 3 entry 5, <sup>13</sup>C

4-phenylbutan-2-one  
R.No-048

exp1 s2pu1

| SAMPLE              |                | SPECIAL |          |
|---------------------|----------------|---------|----------|
| date                | Mar 4 2011     | temp    | not used |
| solvent             | DMSO           | gain    | 2        |
| file                | /export/home/~ | spin    | not used |
| nmr1/2011/March/E~  |                | hst     | 0.008    |
| XTERNAL/Dinsh-UICT~ |                | pw90    | 11.500   |
| /R.No-048.fid       |                | alfa    | 20.000   |

  

| ACQUISITION |         | FLAGS |    |
|-------------|---------|-------|----|
| sw          | 23980.8 | il    | n  |
| at          | 1.815   | in    | n  |
| np          | 87052   | dp    | y  |
| fb          | 13200   | hs    | nn |
| bs          | 4       |       |    |

  

| PROCESSING |                   |
|------------|-------------------|
| dl         | 3.000 lb 4.00     |
| nt         | 12000 fn not used |
| ct         | 192               |

  

| TRANSMITTER |        | DISPLAY |         |
|-------------|--------|---------|---------|
| tn          | C13    | sp      | -470.3  |
| sfrq        | 75.430 | wp      | 18434.2 |
| tof         | 748.9  | rfl     | 6727.0  |
| tpwr        | 56     | rfp     | 2979.2  |
| pw          | 4.750  | rp      | -159.1  |
|             |        | lp      | -299.6  |

  

| DECOUPLER |       | PLOT |      |
|-----------|-------|------|------|
| dn        | H1    | wc   | 250  |
| dof       | 0     | sc   | 0    |
| dm        | yyy   | vs   | 73   |
| dmm       | w     | th   |      |
| dpwr      | 39    | nm   | ph 4 |
| dmf       | 11300 |      |      |

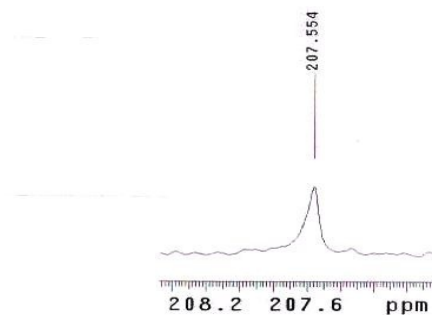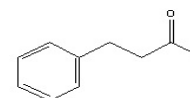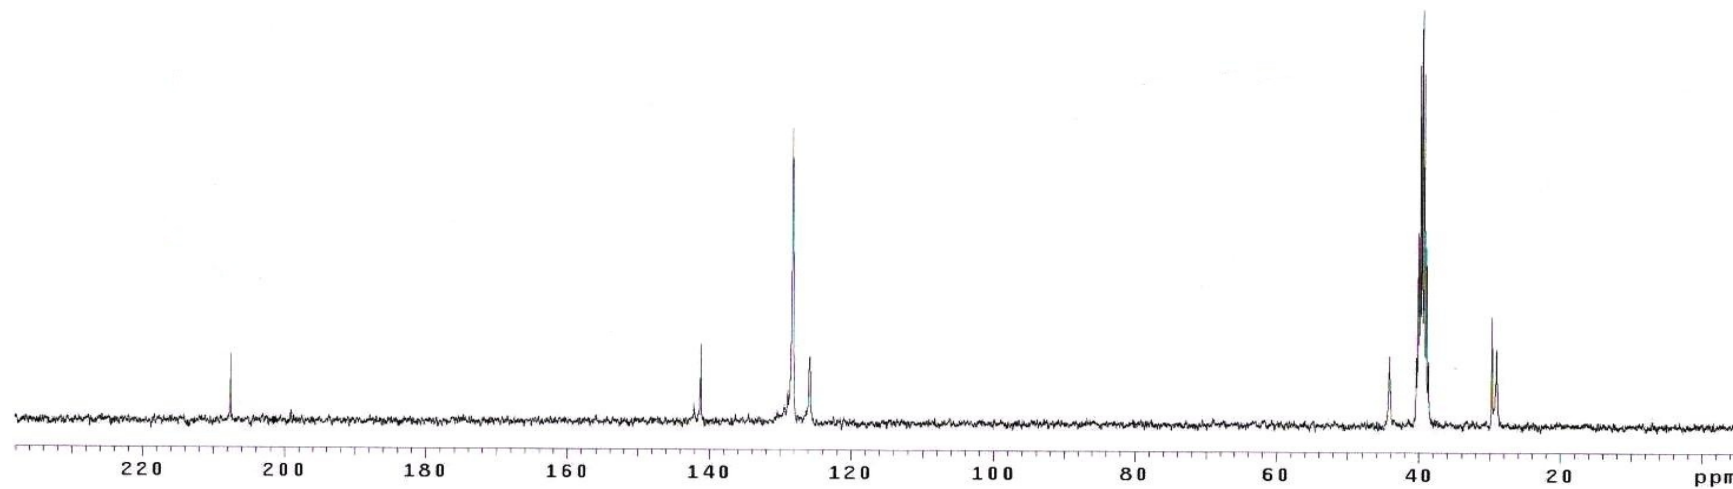



Table 3 entry 6,  $^1\text{H}$

054-Crude  
1H DMSO-d6  
File Ref No :09-111110-25  
MR 400

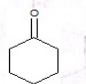

Analyst : SACHIN

File : xp  
Sample id : tmpstudy  
Sample : 054-Crude

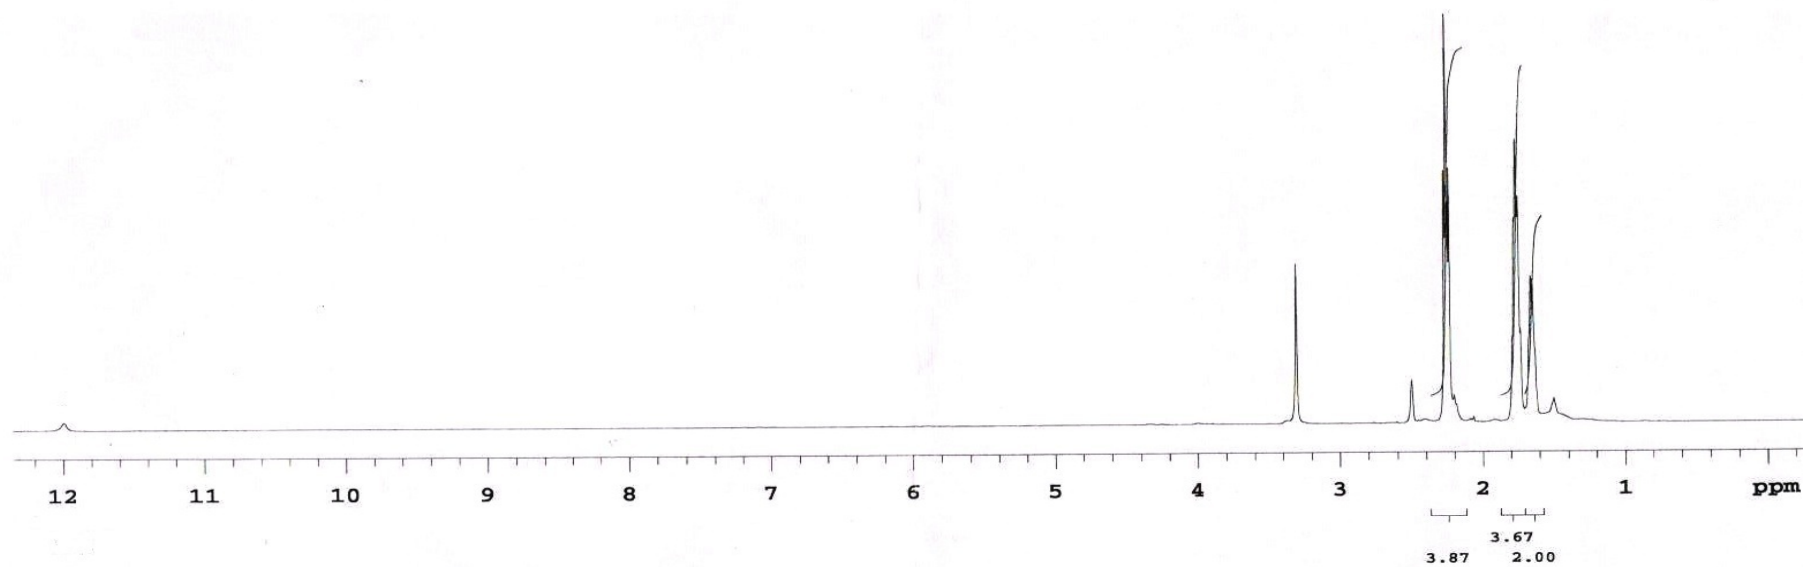

Table 3 entry 6, <sup>13</sup>C

cyclohexanone  
Reaction No-054  
exp1 s2pu1

| SAMPLE              |                | SPECIAL |          |
|---------------------|----------------|---------|----------|
| date                | Mar 4 2011     | temp    | not used |
| solvent             | DMSO           | gain    | 2        |
| file                | /export/home/~ | spin    | not used |
| vmr1/2011/March/E~  | hst            | 0.008   |          |
| XTERNAL/Dinsh-UICT~ | pw90           | 11.500  |          |
| /r.no.054.fid       | alfa           | 20.000  |          |

ACQUISITION

|    |         |    |                 |
|----|---------|----|-----------------|
| sw | 23980.8 | il | n               |
| at | 1.815   | in | n               |
| np | 87052   | dp | y               |
| fb | 13200   | hs | nn              |
| bs | 4       |    |                 |
| d1 | 3.000   | lb | PROCESSING 4.00 |
| nt | 12000   | fn | not used        |
| ct | 148     |    | DISPLAY         |

TRANSMITTER

|      |        |     |         |
|------|--------|-----|---------|
| tn   | C13    | sp  | -494.1  |
| sfrq | 75.430 | wp  | 18271.3 |
| tof  | 748.9  | rfl | 6719.4  |
| tpwr | 56     | rfp | 2979.2  |
| pw   | 4.750  | rp  | -139.5  |
|      |        | lp  | -303.1  |

DECOUPLER

|      |       |    |          |
|------|-------|----|----------|
| dn   | H1    | wc | PLOT 250 |
| dof  | 0     | sc | 0        |
| dm   | yyy   | vs | 103      |
| dmm  | w     | th | 4        |
| dpwr | 39    | nm | ph       |
| dmf  | 11300 |    |          |

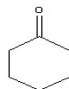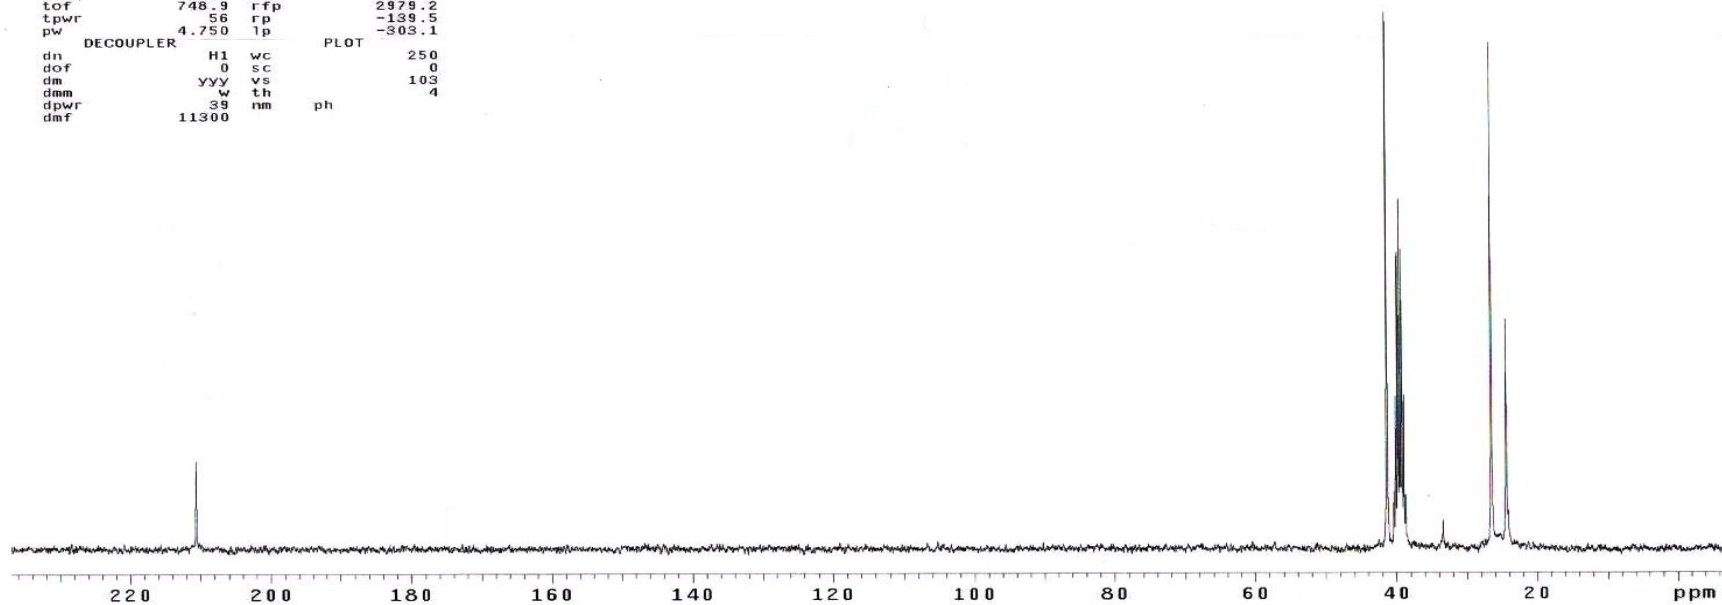

Table 3 entry 8, <sup>1</sup>H

3-(4-Chloro-phenyl)-1-phenyl-propan-1-one

42-Crude

<sup>1</sup>H, DMSO-d<sub>6</sub>

Ref No : 04-031110-23

MR 400 MHz

Analyst : NITIN

Sample Name:

42-Crude

Data Collected on:

Varian-NMR-vnmrs400

Archive directory:

Sample directory:

FidFile: PROTON

Pulse Sequence: PROTON (s2pul)

Solvent: dms0

Data collected on: Nov 3 2010

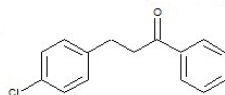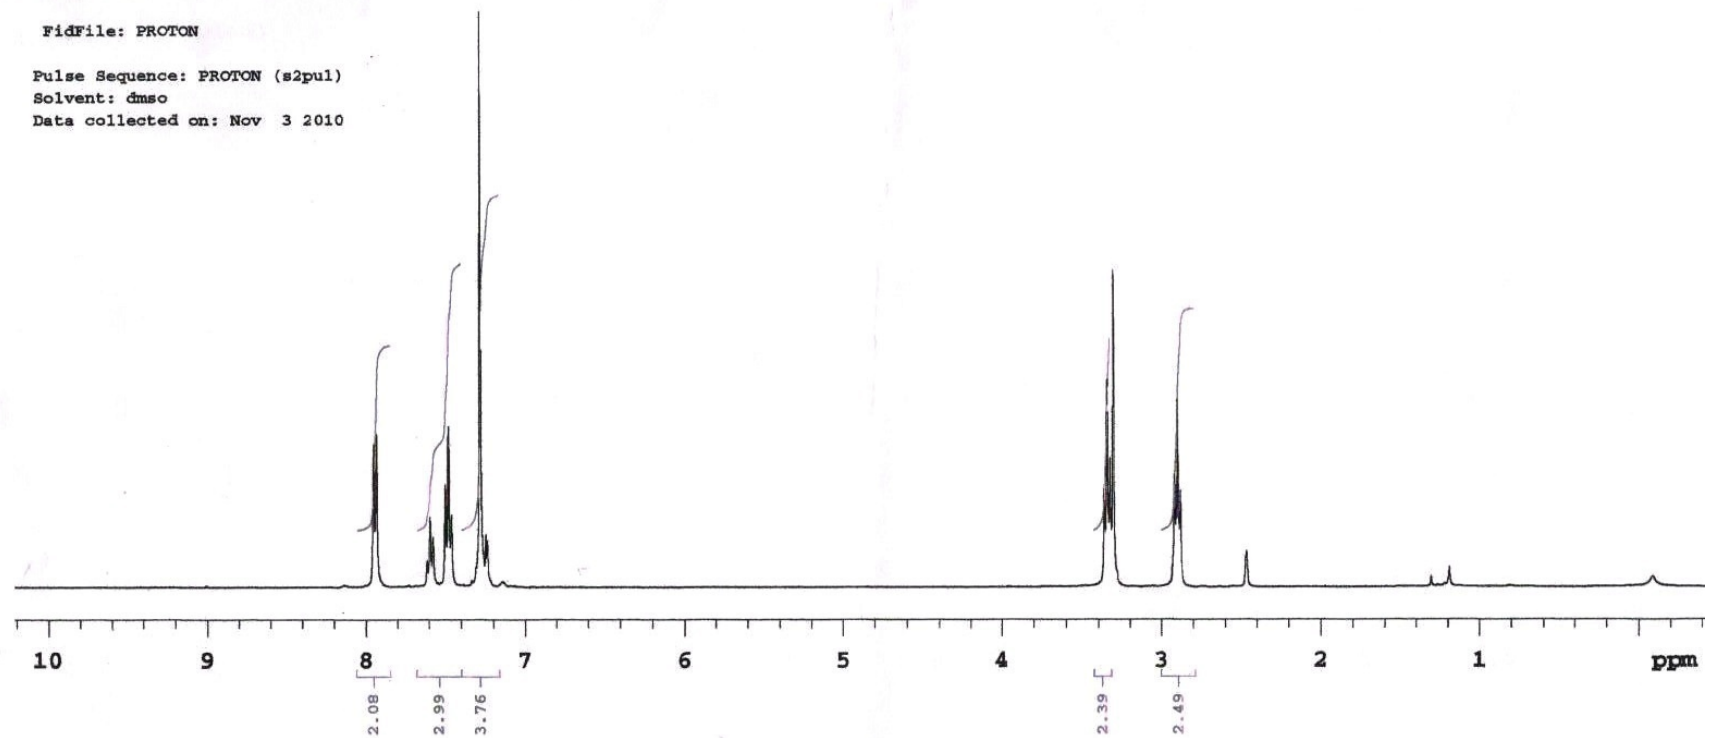

Table 3 entry 8, <sup>13</sup>C

3-(4-chlorophenyl)-1-phenylpropan-1-one  
R.No-042

```
exp1 s2pu1
SAMPLE
date Mar 4 2011 temp not used
solvent DMSO gain 2
file /export/home/~ spin not used
vnmr1/2011/March/E~ hst 0.008
XTURNAL/Dinsh-UICT~ pw90 11.500
/R.no-042.fid alfa 20.000
ACQUISITION
sw 23980.8 il
at 1.815 in
np 87052 dp
fb 13200 hs
bs 4
d1 3.000 lb
nt 12000 fn
ct 220
TRANSMITTER
tn C13
sfrq 75.430
tof 748.9
tpwr 56
pw 4.750
DECOUPLER
dn H1
dof 0
dm yyy
dmm w
dpwr 39
dmf 11300
SPECIAL
temp not used
gain 2
spin not used
hst 0.008
pw90 11.500
alfa 20.000
FLAGS
il n
in n
dp y
hs nn
lb 4.00
fn not used
sp -532.5
wp 18434.2
rfl 6725.9
rfp 2979.2
rp -124.7
lp -348.9
PROCESSING
lb 4.00
fn not used
sp -532.5
wp 18434.2
rfl 6725.9
rfp 2979.2
rp -124.7
lp -348.9
DISPLAY
not used
PLOT
wc 250
sc 0
vs 135
th
nm ph 4
```

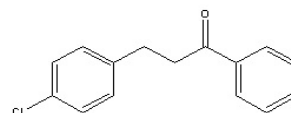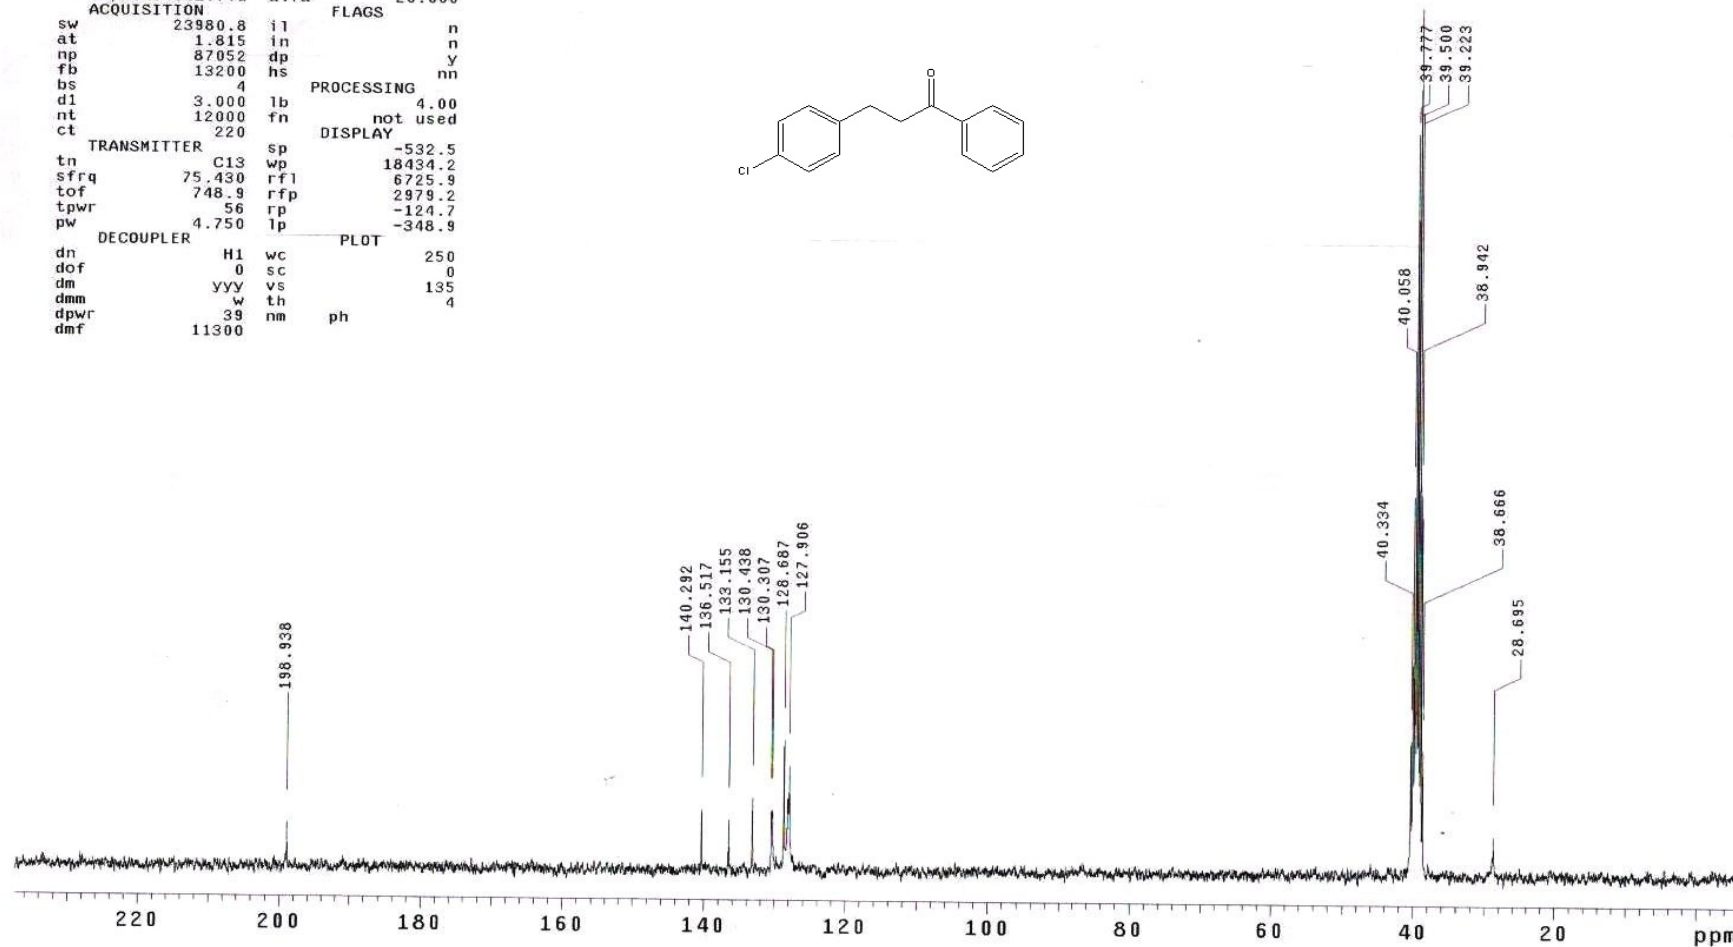

Table 3 entry 10,  $^1\text{H}$

1-Phenyl-3-thiophen-2-yl-propan-1-one

045-Crude  
1H DMSO-d6  
File Ref No : 09-111110  
MR 400

Analyst : SACHIN

File : xp  
Sample id : tmpstudy  
Sample : 045-Crude

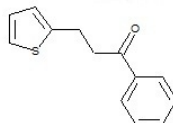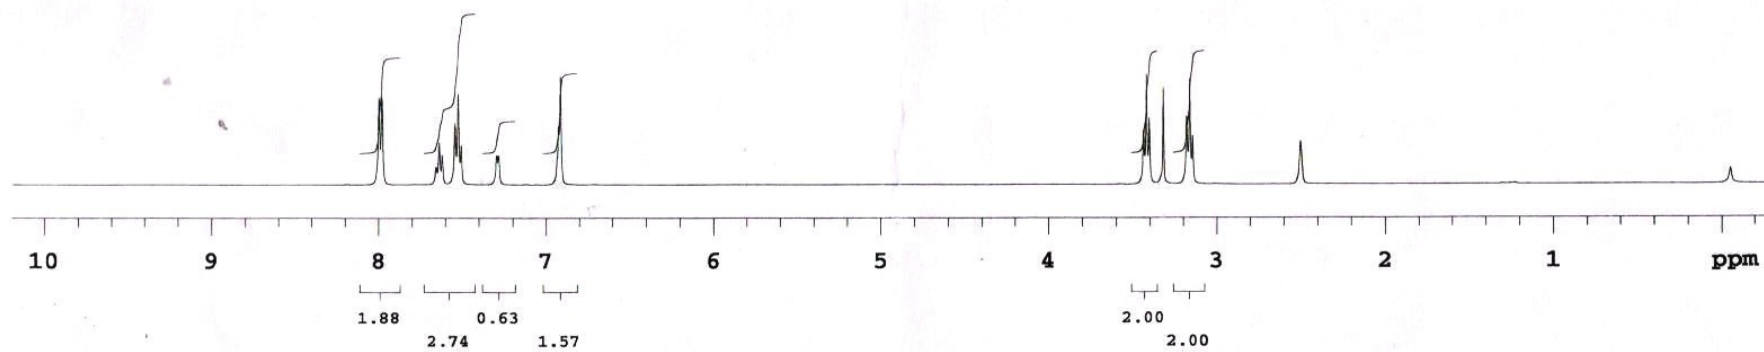

Table 3 entry 10, <sup>13</sup>C

1-phenyl-3-(thiophen-2-yl)propan-1-one

R.No-045

exp3 s2pu1

| SAMPLE      |            | SPECIAL    |          |
|-------------|------------|------------|----------|
| date        | Mar 4 2011 | temp       | not used |
| solvent     | DMSO       | gain       | 2        |
| file        | exp        | spin       | not used |
| ACQUISITION |            |            |          |
| sw          | 23980.8    | pw90       | 11.500   |
| at          | 1.815      | alfa       | 20.000   |
| np          | 87052      | FLAGS      |          |
| fb          | 13200      | il         | n        |
| bs          | 4          | in         | n        |
| d1          | 3.000      | dp         | y        |
| nt          | 12000      | hs         | nn       |
| ct          | 100        | PROCESSING |          |
| TRANSMITTER |            | lb         | 2.00     |
| tn          | C13        | fn         | not used |
| sfrq        | 75.430     | DISPLAY    |          |
| tof         | 748.9      | sp         | -60.5    |
| tpwr        | 56         | wp         | 16637.9  |
| pw          | 4.750      | rfl        | 6727.0   |
| DECOUPLER   |            | rfp        | 2979.2   |
| dn          | H1         | rp         | -127.4   |
| dof         | 0          | lp         | -334.1   |
| dm          | yyy        | PLOT       |          |
| dmm         | w          | wc         | 250      |
| dpwr        | 39         | sc         | 0        |
| dmf         | 11300      | vs         | 49       |
|             |            | th         | 4        |
|             |            | nm         | ph       |

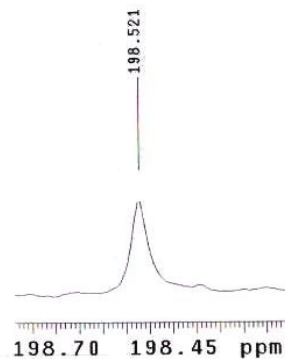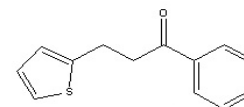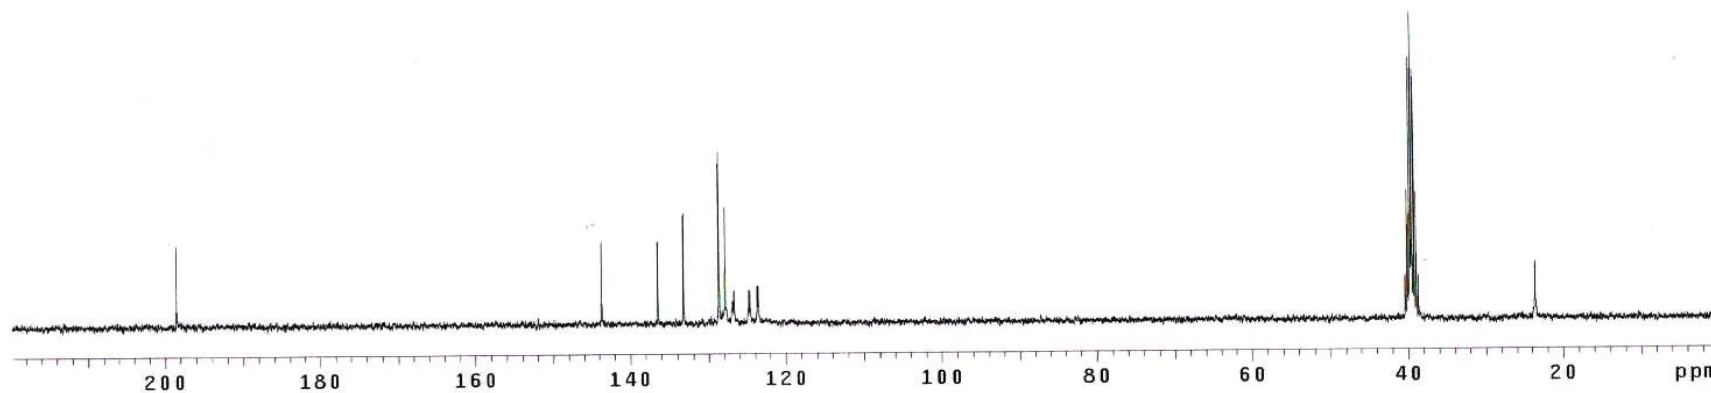

Table 3 entry 11,  $^1\text{H}$

3-Furan-2-yl-1-phenyl-propan-1-one

066-Crude

$^1\text{H}$  DMSO- $d_6$

File Ref No : 09-111110-28

MR 400

Analyst : SACHIN

File : xp

Sample id : tmpstudy

Sample : 066-Crude

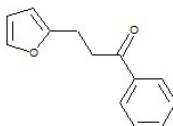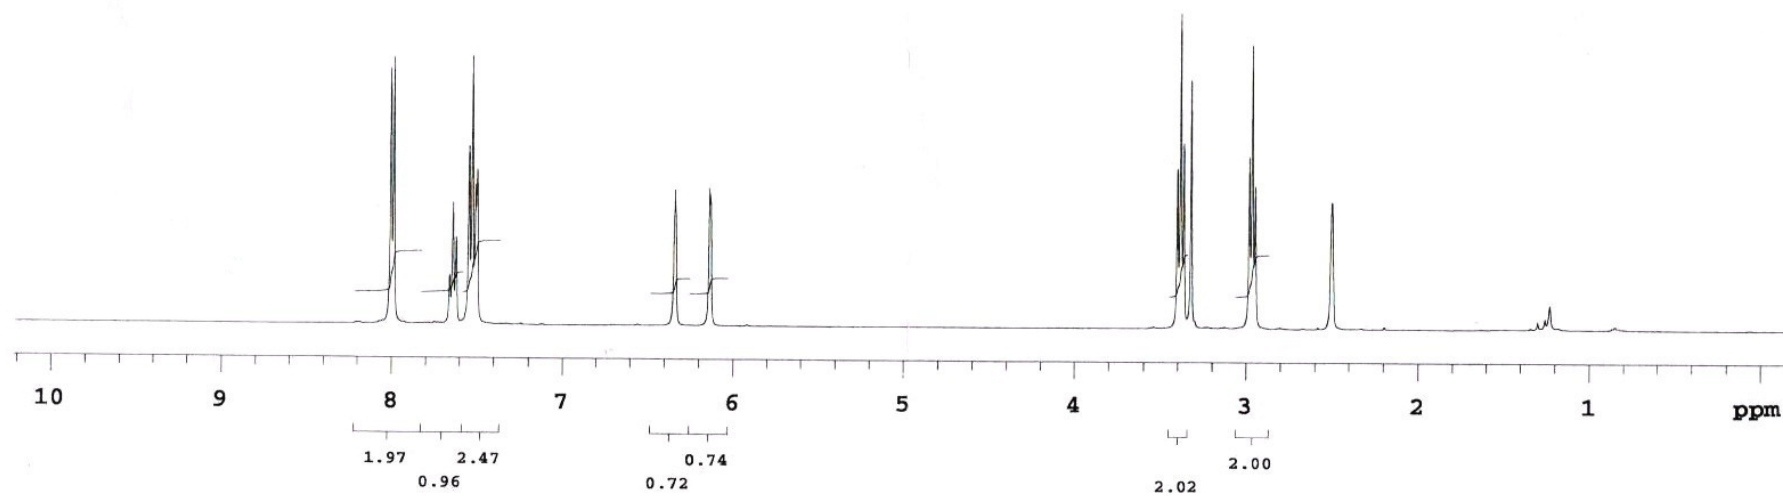

Table 3 entry 11, <sup>13</sup>C

3-(furan-2-yl)-1-phenylpropan-1-one

R.No-066

exp3 s2pu1

| SAMPLE      |            | SPECIAL    |          |
|-------------|------------|------------|----------|
| date        | Mar 4 2011 | temp       | not used |
| solvent     | DMSO       | gain       | 2        |
| file        | exp        | spin       | not used |
| ACQUISITION |            |            |          |
| sw          | 23980.8    | hst        | 0.008    |
| at          | 1.815      | pw90       | 11.500   |
| np          | 87052      | alfa       | 20.000   |
| fb          | 13200      | FLAGS      |          |
| bs          | 4          | il         | n        |
| d1          | 3.000      | in         | n        |
| nt          | 12000      | dp         | y        |
| ct          | 1156       | hs         | nn       |
| TRANSMITTER |            | PROCESSING |          |
| tn          | C13        | lb         | 4.00     |
| sfrq        | 75.430     | fn         | not used |
| tof         | 748.9      | DISPLAY    |          |
| tpwr        | 56         | sp         | -27.9    |
| pw          | 4.750      | wp         | 16575.0  |
| DECOUPLER   |            | rfl        | 6726.3   |
| dn          | H1         | rfl        | 2979.2   |
| dof         | 0          | rp         | -136.3   |
| dm          | w          | lp         | -307.2   |
| dmm         | yyv        | PLOT       |          |
| dpwr        | 39         | wc         | 250      |
| dmf         | 11300      | sc         | 0        |
|             |            | vs         | 414      |
|             |            | th         | 4        |
|             |            | nm         | ph       |

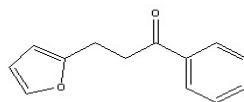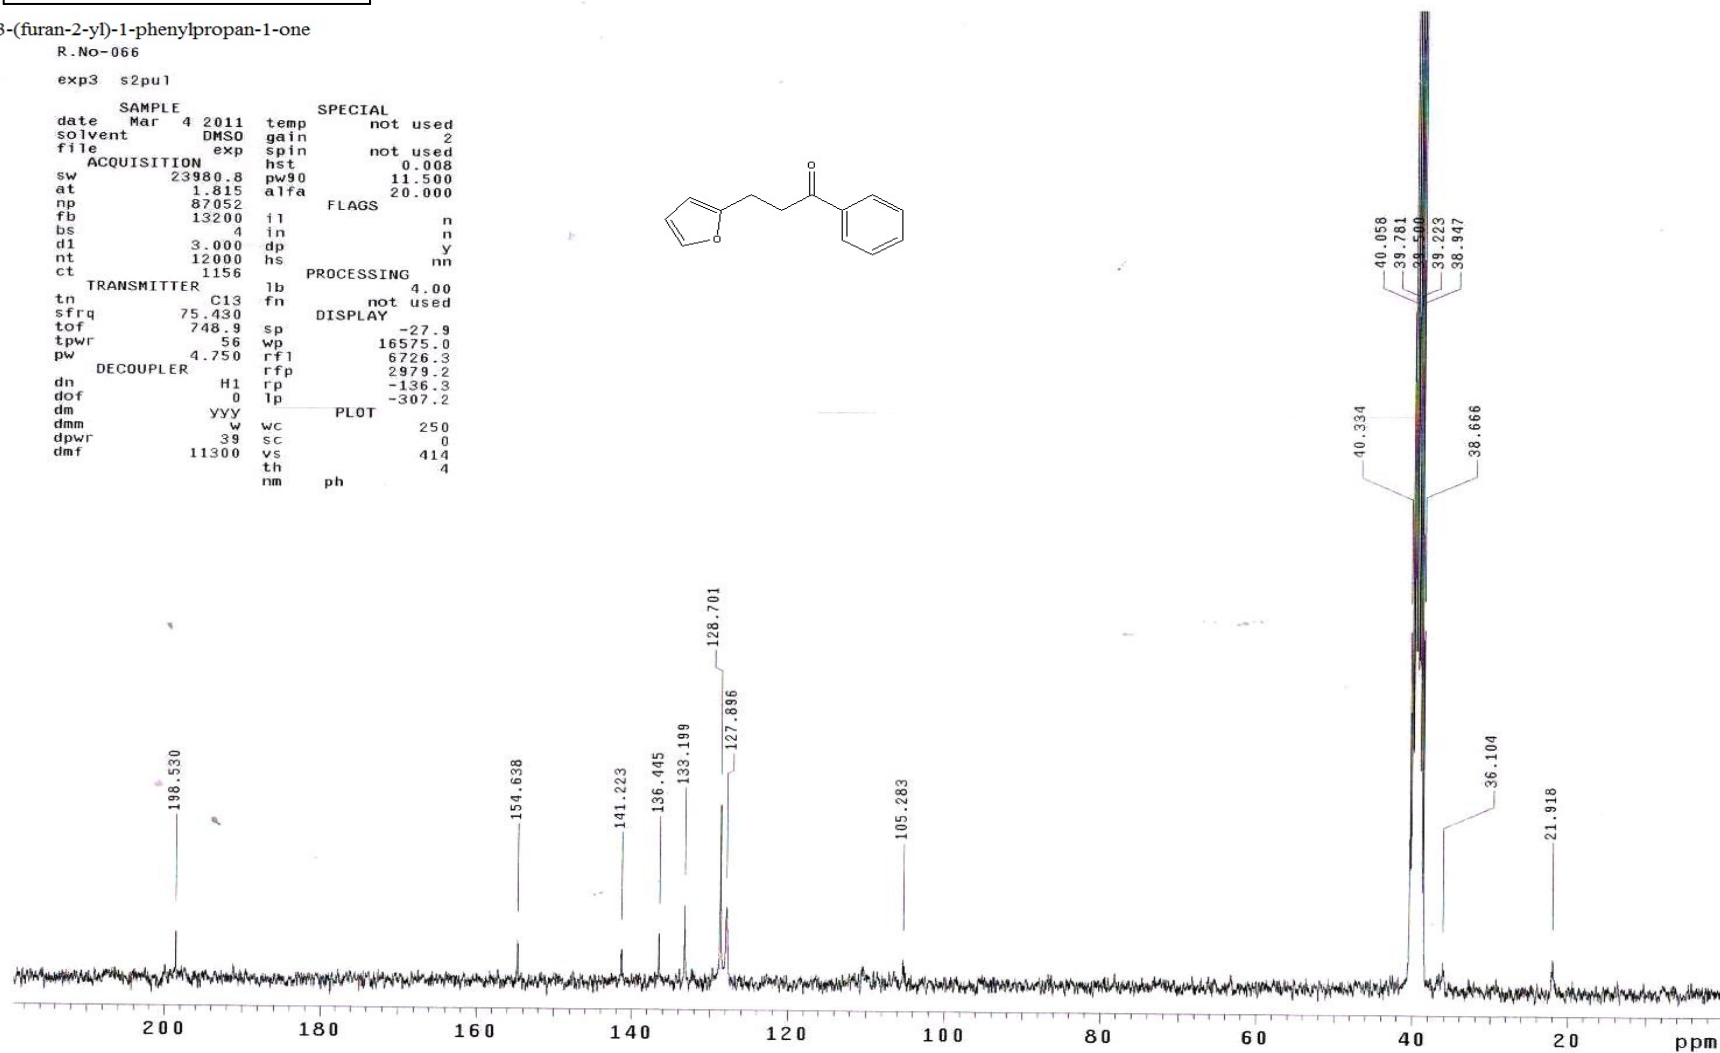

Supplement: c1gc15050b.pdf [file c1gc15050b.pdf]
